# Supplementary material for: Mitochondrial DNA haplogroups in early-onset Alzheimer's disease and frontotemporal lobar degeneration
Source: Springer Nature journal article supplement (doi:10.1186/1750-1326-5-8), 2010-02-02
Supplement: Additional file 3 [file 1750-1326-5-8-s3.pdf]

**Additional file 3** Comparison of the present data with previously published findings on the frequencies of mtDNA haplogroups among AD patients and controls, and relative risk (RR) values for the mtDNA haplogroups among patients with AD.

| <b>Haplogroup</b> | <b>Chinnery et al. 2000</b> |          |      | <b>Carrieri et al. 2001</b> |          |      | <b>Mancuso et al. 2007</b> |          |      | <b>Maruszak et al. 2008</b> |          |      | <b>Krüger et al. 2009</b> |          |      |
|-------------------|-----------------------------|----------|------|-----------------------------|----------|------|----------------------------|----------|------|-----------------------------|----------|------|---------------------------|----------|------|
|                   | Patients                    | Controls | RR   | Patients                    | Controls | RR   | Patients                   | Controls | RR   | Patients                    | Controls | RR   | Patients                  | Controls | RR   |
|                   | (%)                         | (%)      |      | (%)                         | (%)      |      | (%)                        | (%)      |      | (%)                         | (%)      |      | (%)                       | (%)      |      |
| <b>H</b>          | 47.6                        | 41.3     | 1.15 | 43.2                        | 34.1     | 1.27 | 43.8                       | 41.4     | 1.06 | 51.4                        | 42.8     | 1.20 | 43.8                      | 34.3     | 1.28 |
| <b>I</b>          | 1.6                         | 1.7      | 0.94 | n.d.                        | n.d.     | -    | 2.4                        | 1.6      | 1.50 | 1.8                         | 2.0      | 0.90 | 0.0                       | 0.0      | 0.00 |
| <b>J</b>          | 9.2                         | 14.0     | 0.66 | 8.5                         | 7.8      | 1.09 | 8.1                        | 7.3      | 1.11 | 7.2                         | 11.5     | 0.63 | 5.5                       | 2.0      | 2.75 |
| <b>K</b>          | 11.4                        | 11.7     | 0.97 | 5.6                         | 9.5      | 0.59 | 5.7                        | 8.9      | 0.64 | 3.2                         | 4.8      | 0.67 | 3.9                       | 3.0      | 1.30 |
| <b>T</b>          | 8.6                         | 10.1     | 0.85 | 15.5                        | 11.7     | 1.32 | 7.1                        | 10.5     | 0.68 | 8.6                         | 9.5      | 0.91 | 5.5                       | 8.1      | 0.68 |
| <b>U</b>          | 18.4                        | 17.9     | 1.03 | 11.3                        | 11.2     | 1.01 | 13.8                       | 12.6     | 1.10 | 12.2                        | 17.1     | 0.71 | 32.0                      | 34.3     | 0.93 |
| <b>V</b>          | n.d.                        | n.d.     | -    | n.d.                        | n.d.     | -    | 4.3                        | 2.1      | 2.05 | 2.7                         | 2.8      | 0.96 | 4.7                       | 6.1      | 0.77 |
| <b>W</b>          | 1.6                         | 0.6      | 2.67 | n.d.                        | n.d.     | -    | 2.4                        | 2.1      | 1.14 | 4.0                         | 1.2      | 3.33 | 3.9                       | 8.1      | 0.48 |
| <b>X</b>          | n.d.                        | n.d.     | -    | n.d.                        | n.d.     | -    | 4.3                        | 2.6      | 1.65 | 1.8                         | 2.4      | 0.75 | 0                         | 1.0      | 0.00 |
| <b>Other</b>      | 1.6                         | 2.8      | 0.57 | 16.0                        | 25.7     | 0.62 | 8.1                        | 10.9     | 0.74 | 7.2                         | 5.9      | 1.22 | 0.8                       | 3.1      | 0.26 |
| <b>Total n</b>    | 185                         | 179      |      | 213                         | 179      |      | 209                        | 191      |      | 222                         | 252      |      | 128                       | 99       |      |
